# Supplementary material for: Stratospheric aerosol size reduction after volcanic eruptions
Source: Copernicus journal article supplement (doi:10.5194/egusphere-2023-837), 2023-05-04

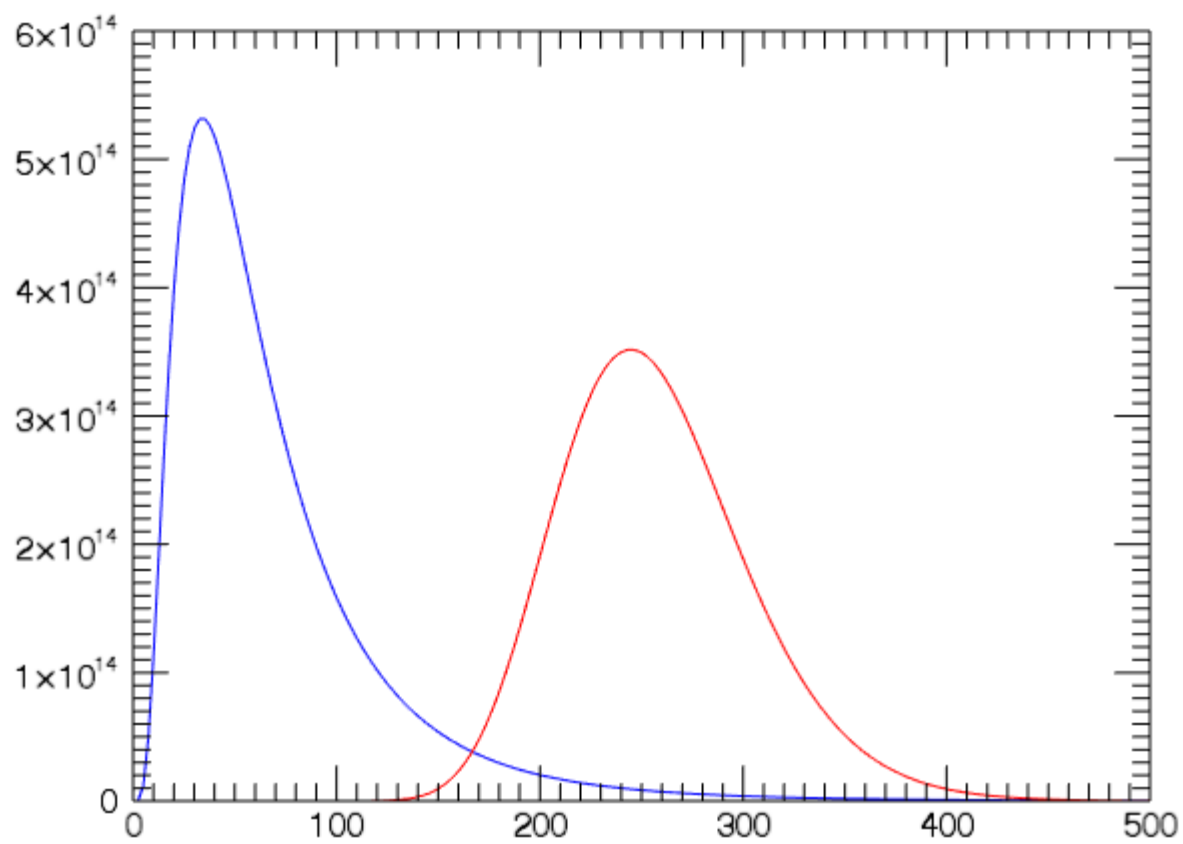

Supplement: Supplementary file [file egusphere-2023-837-RC1-supplement.pdf]
